# Supplementary material for: The GLP-1 Analogs Liraglutide and Semaglutide Reduce Atherosclerosis in ApoE−/− and LDLr−/− Mice by a Mechanism That Includes Inflammatory Pathways
Source: PubMed Central journal article supplement — JACC Basic Transl Sci. 2018 Nov 21;3(6):844–57. doi: 10.1016/j.jacbts.2018.09.004 (PMC6314963; doi:10.1016/j.jacbts.2018.09.004), 2018-11-21
Supplement: mmc1.pdf [file mmc1.pdf]

## Supplements

**Table S1**

### 275 Gene List

| Gene   | Accession number | Position  | Target sequence                                                                                        |
|--------|------------------|-----------|--------------------------------------------------------------------------------------------------------|
| ABCA1  | NM_013454.3      | 6866-6965 | CTCCTTGTCTCTCTAGCCAGGATATTCAGCATCCTCTCCCAGAGCAAAAAGCGACTCCACATAGAAGACTACTCTGTCTCTCAGACAACACTTGACCAA    |
| ACAT1  | NM_144784.3      | 1331-1430 | TGCTGATTGAGAAGCTGTAGACAACCTGTTTTAGGAGACAGTTCCATGTGACCGGCTGAAGTAAATGTGACTCCCTGGGCCAGGTTATATTCAGCATAA    |
| ACE    | NM_009598.1      | 326-425   | AGATCCTGCTTGAGAAAAGCACGGAGGTATCCAATCACACCCTGAAATATGGCACCCGGGCCAAGACATTTGATGTGAGCAACTTTCAAACCTCTTCCAT   |
| ACTA2  | NM_007392.2      | 46-145    | GGAACCCTGAGACGCTGCTCCAGCTATGTGTGAAGAGGAAGACAGCACAGCCCTGGTGTGCGACAATGGCTCTGGGCTCTGTAAGGCCGGCTTCGCTGGT   |
| ACTB   | NM_007393.1      | 816-915   | CAGGTCATCACTATTGGCAACGAGCGGTTCCGATGCCCTGAGGCTCTTTCCAGCCTTCTTCTTGGGTATGGAATCCTGTGGCATCCATGAAACTACAT     |
| ACTN4  | NM_021895.2      | 270-369   | CAGCCTGGTGCAACTCTCATCTTCGGAAGGCTGGCCTCAGATCGAGAATATCGATGAGGACTTCAGGGATGGGCTCAAACCTTATGCTTCTGTTGGAGGT   |
| ACVRL1 | NM_009612.2      | 2986-3085 | AGAGAAGTGAAGTGTAGGCGAGGCTTAAGAAGGGTAAAGCAGGGTTCAGGCAAGAGACAAGGTCAGCCTCATCTTGGGAAGACCTGGCCTAGAAACTAT    |
| EMR1   | NM_010130.1      | 996-1095  | TGATGAGTGCACCCAAGATCCATTACAATGTGGACTGAATTCTGTCTGCACCAATGTACCAGGCTCCTACATCTGTGGCTGCCTCCCTGACTTTCAAATG   |
| ADIPOQ | NM_009605.4      | 781-880   | GACCACAATGGACTCTATGCAGATAACGTCAACGACTCTACATTTACTGGCTTTCTTCTCTACCATGATACCAACTGACTGCAACTACCCATAGCCCATA   |
| AGER   | NM_007425.2      | 362-461   | CAACTACCGAGTCCGAGTCTACCAGATTCTGGGAA GCCAGAAATTGTGGATCCTGCCTCTGAACTCACAGC CAGTGTCCCTAATAAGGTGGGGACATGT  |
| AGT    | NM_007428.3      | 882-981   | CACTTCCAAGGAACGATGAGAGGTTTCTCTCAGCTG CCTGGAGTCCATGAATTCTGGGTGGACAACAGCATC TCGGTGTCTGTGCCCATGATCTCCGGCA |
| AGTR1A | NM_177322.3      | 1668-1767 | AAGGACAAGTCAGGAGCTGGATGGATTTGTGGGTT TAAAACGGTTTGCTGGCAGACACGCAATCGCAGCG GTCTCCTTTTGATTTCCACACATAGGTATG |
| AGTR2  | NM_007429.4      | 986-1085  | TTCTGACCTTCTTGGATGCTCTGACCTGGATGGGTA TCATTAATAGCTGTGAAGTTATAGCAGTCATTGACC TGGCACTTCTTTTGCCATCCTCCTGGG  |
| ANGPT2 | NM_007426.3      | 2021-2120 | GAAGAATGTTCCGTGGGAGTTCAGCAGTAAATAACT GGAAAACAGAACACTTAGATGGTGCAGATAAATCTT GGGACCACATTCCTCTAAGCACGGTTTC |
| APLN   | NM_013912.3      | 2627-2726 | TATTCAGGAGGGCATTCTTTTTCTCCTAGGGCCAAT CTTGTCCCTGTGCCACAGATTGCACGTGTAGGGA GGTGAGTGCTTGATCCCAAATTGGTTCT   |
| APOB   | NM_009693.2      | 6331-6430 | CCAGACTATTTGGAGAGAAATCGAAGAGGAATGATA AGTCTACTGGAAGCCATGCGAGGGGAATTGCAACG CCTCAGTGTTGATCAGTTTGTGAGGAAAT |

|        |                 |               |                                                                                                               |
|--------|-----------------|---------------|---------------------------------------------------------------------------------------------------------------|
| APOE   | NM_009696.<br>2 | 11-110        | CGGAAGGAGCTGACTGGCCAATCACAATTGCGAAG<br>ATGAAGGCTCTGTGGGCCGTGCTGTTGGTCACATT<br>GCTGACAGGATGCCTAGCCGAGGGAGAGCC  |
| AQP1   | NM_007472.<br>1 | 2256-<br>2355 | ACACTCGTCTCCGTTCCCTAGCAGACTGTACCCA<br>CTTAACAGATAAGGGCACTGAGGACCCATATGCTCA<br>ACTGTATCATATTGGATCAAGCTTAGCA    |
| AR     | NM_013476.<br>3 | 2216-<br>2315 | CATGGGTTGGCGGTCCTTCACTAATGTCAACTCCAG<br>GATGCTCTACTTTGCACCTGACTTGGTTTTCAATGA<br>GTACCGCATGCACAAGTCTCGGATGTAC  |
| ARG1   | NM_007482.<br>3 | 627-726       | GTACATTGGCTTGGCGAGACGTAGACCCTGGGGAAC<br>ACTATATAATAAAAACTCTGGGAATTAAGTATTTCTC<br>CATGACTGAAGTAGACAAGCTGGGGATT |
| B2M    | NM_009735.<br>3 | 178-277       | CTGAACTGCTACGTAACACAGTTCACCCGCCTCAC<br>ATTGAAATCCAAATGCTGAAGAACGGGAAAAAATT<br>CCTAAAGTAGAGATGTCAGATATGCTCT    |
| B4GAT1 | NM_175383.<br>2 | 1147-<br>1246 | AGGAAAGGTGCCACATTTGACGAACGCTTTCGGC<br>AGTATGGTTTTCAATCGAATCAGCCAGGCTTGTGAGC<br>TGCACGTGGCAGGGTTAATTTTGAAGTG   |
| BAX    | NM_007527.<br>3 | 736-835       | CATAAATTATGACATTTTCTGGGATGAATGGGGGA<br>AGGGGAAAGGCATTTTTCTTACTTTTGTAAATTATTGG<br>GAGGGGTGGGAATGGTGGCCTGGGGAG  |
| BGLAP  | NM_007541.<br>2 | 252-351       | GTGAGCTTAACCCTGCTTGTGACGAGCTATCAGACC<br>AGTATGGCTTGAAGACCGCCTACAAACGCATCTATG<br>GTATCACTATTTAGGACCTGTGCTGCCC  |
| BSG    | NM_009768.<br>2 | 971-<br>1070  | AGCACTGAAGCCAATGGCAAGTATGTGGTGGTATC<br>CACGCCTGAGAAGTCACAGCTGACCATCAGCAACCT<br>TGACGTAATGTTGACCCTGGCACCTACG   |
| C5AR1  | NM_007577.<br>3 | 596-695       | CATTGCTCCTCACCATTCCATCCTTCGTGTACCGGG<br>AGGCATATAAGGACTTCTACTCAGAGCACACTGTAT<br>GTGGTATTA ACTATGGTGGGGGTAGCTT |
| CASP3  | NM_009810.<br>2 | 631-730       | GAGGCTGACTTCTGTATGCTTACTCTACAGCACCT<br>GGTACTATTCTGGAGAAATTCAAAGGACGGGTGCG<br>TGGTTCATCCAGTCCCTTTGCAGCATGC    |
| CAV1   | NM_007616.<br>3 | 1921-<br>2020 | AACCCAAACTGAGGAATTTACCTGTGTACCTGAGT<br>CTCCAGAAAGCTGCCTGCCTGGGACACCCAAAAGC<br>CTTTTACTTCCCAGCTCACATTACAGCTC   |
| CAV2   | NM_016900.<br>4 | 361-460       | CTACACACTCCTTTGACAAAGTGTGGATCTGCAGCC<br>ATGCTCTCTTTGAAATCAGCAAATATGTGATGTACAA<br>GTTCTGACCGTATTTCTGGCCATCCC   |
| CCL11  | NM_011330.<br>3 | 431-530       | CAACCTCCTCTTTGACACTAACCCAGAGCCTAAGA<br>ACTGCTTGATTCTTCTCTTTCTAAGACGTGCTCTG<br>AGGGAATATCAGCACCAGTCGCCAAG      |
| CCL12  | NM_011331.<br>1 | 1-100         | TTTCGAAGTCTTTGACCTCAACATGAAGATTTCCACA<br>CTTCTATGCCTCCTGCTCATAGCTACCACCATCAGT<br>CCTCAGGTATTGGCTGGACCAGATGCG  |
| CCL19  | NM_011888.<br>2 | 466-565       | CTTCTGCCAAGAACAAGGCAACAGCACCAGAAGG<br>AGCCCTGTGTCTTGAGTAAAGAGATGTGAATCACTC<br>TGGCCCAGGAAACCAAGGACCAGAAGAGA   |
| CCL2   | NM_011333.<br>3 | 416-515       | TCTTCAGCACCTTTGAATGTGAAGTTGACCCGTA<br>TCTGAAGCTAATGCATCCACTACCTTTTCCACAACCA<br>CCTCAAGCACTTCTGTAGGAGTGACCA    |
| CCL20  | NM_016960.<br>1 | 121-220       | GCAGCAAGCAACTACGACTGTTGCCTCTCGTACATA<br>CAGACGCCTCTTCTTCCAGAGCTATTGTGGGTTTC<br>ACAAGACAGATGGCCGATGAAGCTTGTG   |
| CCL22  | NM_009137.<br>2 | 1097-<br>1196 | CCAAGAATCAACTTCCACCCCTTCAACCATGC<br>TAGGGTCTTTTACTTTCTCTGCCCCACACCTTTGACT                                     |

|        |                    |               |                                                                                                                |
|--------|--------------------|---------------|----------------------------------------------------------------------------------------------------------------|
|        |                    |               | CCTTGCCTGTGTAGCTGATAGTCGAAG                                                                                    |
| CCL26  | NM_0010134<br>12.2 | 141-240       | CAGCTATAAGTTCACCGACAAGAGCTGCACCAAGTGA<br>CGGTGTGATATTCTTTACAAAAACAGGTAAGCAATT<br>CTGTGTCCAGCCAGGGGCCAAATGGGTG  |
| CCL3   | NM_011337.<br>1    | 61-160        | TCTGTCACCTGCTCAACATCATGAAGGTCTCCACCA<br>CTGCCCTTGCTGTTCTTCTCTGTACCATGACACTCTG<br>CAACCAAGTCTTCTCAGCGCCATATGG   |
| CCL5   | NM_013653.<br>1    | 166-265       | CCTCGTGCCACGTCAAGGAGTATTTCTACACCAGC<br>AGCAAGTGCTCCAATCTTGACAGTCGTGTTTGTCACT<br>CGAAGGAACCGCCAAGTGTGTGCCAACCC  |
| CCL7   | NM_013654.<br>2    | 216-315       | ACAGAAGGATCACCAGTAGTCGGTGTCCCTGGGAA<br>GCTGTTATCTTCAAGACAAAGAAGGGCATGGAAGTC<br>TGTGCTGAAGCCCATCAGAAGTGGGTCTGA  |
| CCL9   | NM_011338.<br>2    | 1126-<br>1225 | ATGGCAACCCAGGTACATTCAACTAGGATGAAATAA<br>ATTCTGCCTTAGCCCAGTAGTATGTCTGTGTTTGTAA<br>GGACCCAGCTGATTTTCCCACCACCCC   |
| CCR1   | NM_009912.<br>4    | 1527-<br>1626 | CTTCTGATT CAGACCATAGGTGTCAACCAAGGAAGG<br>TCTAAGAAGAGAATGAGGAGACAGTATATAGCTCTC<br>CAAGACTGATACTGACAGTTCTTACAGT  |
| CCR2   | NM_009915.<br>2    | 2966-<br>3065 | ATGAACTAACATAGACAGCTCAGGATTAACAGGGAC<br>TTGTGTTTTGTGGTCTGTGGGCTTATCCAAGCATGG<br>TGATTTAGACTCTAAGGTCCGTCTGGAT   |
| CD163  | NM_053094.<br>2    | 3226-<br>3325 | TCACGGCACTCTTGGTTTGTGGAGCCATTCTATTGG<br>TCCTCCTCATTGTCTTCTCCTGTGGACTCTGAAGC<br>GACGACAGATT CAGCGACTTACAGTTTC   |
| CD36   | NM_007643.<br>3    | 1521-<br>1620 | GGGACCATTGGTGATGAAAAAGCAGAAATGTTCAA<br>ACACAAGTGACTGGGAAAATCAAGCTCCTTGGCATG<br>GTAGAGATGGCCTTACTTGGGATTGGAG    |
| CD38   | NM_007646.<br>4    | 1491-<br>1590 | TATTCACATGGTAAACCTGAGGTCATAGGGTCATTA<br>TAGGGAAGGTGCTGTGTGGGAACTACCCACGTGCC<br>CTGTGCTTTAATCTTTAACTCAACACATC   |
| CD4    | NM_013488.<br>2    | 951-<br>1050  | AAGAGGTGTCCGTACAAAAGTCCACCAAAGACCTCA<br>AGCTCCAGCTGAAGGAAACGCTCCCCTCACCCTCA<br>AGATACCCAGGTCTCGCTTCAGTTTGC     |
| CD68   | NM_009853.<br>1    | 637-736       | AGCCCGAGTACAGTCTACCTGGACTACATGGCGGT<br>GGAATACAATGTGTCCTTCCACAGGCAGCACAGTG<br>GACATTCATGGCGCAGAATTCATCTCTTC    |
| CD80   | NM_009855.<br>2    | 211-310       | TGGCTTTCCCATCATGTTCTCAAAGCATCTGAAG<br>CTATGGCTTGCAATTGTCAGTTGATGCAGGATACAC<br>CACTCCTCAAGTTTCCATGTCCAAGGCT     |
| CD86   | NM_019388.<br>3    | 252-351       | CAAAACATAAGCCTGAGTGAGCTGGTAGTATTTTGG<br>CAGGACCAGCAAAAGTTGGTTCTGTACGAGCACTAT<br>TTGGGCACAGAGAACTTGATAGTGTGA    |
| CD8A   | NM_0010811<br>10.2 | 356-455       | CCACCTTCGTTGTCTATATGGCTTCATCCCACAACAA<br>GATAACGTGGGACGAGAAGCTGAATTCGTGAAAC<br>TGTTTTCTGCCATGAGGGACACGAATAA    |
| CDH1   | NM_009864.<br>2    | 1611-<br>1710 | TCGAAGTGCCCGAAGACTTTGGTGTGGGTGTCAGGAA<br>ATCACATCTTATACCGCTCGAGAGCCGGACACGTTT<br>ATGGATCAGAAGATCACGTATCGGATTTG |
| CDH5   | NM_009868.<br>3    | 1616-<br>1715 | CAGCAACTTCACCCTCATAAACAACCATGACAACAC<br>CGCCAACATCACGGTCAAGTATGGGCAGTTTAATCG<br>GGAGCATGCCAAGTTCCACTACCTGCC    |
| CDKN1A | NM_007669.<br>4    | 1671-<br>1770 | AATACCGTGGGTGTCAAAGCACTTAGTGGGTCTGAC<br>TCCAGCCCCAACATCCCTGTTTCTGTAACATCCTG<br>GTCTGGACTGTCTACCCTTAGCCCGCAC    |
| CIDEB  | NM_009894.         | 180-279       | ATCCACTGTGAGCTCGGAGTTAAGCCGTAGGGTCT                                                                            |

|        |                    |               |                                                                                                               |
|--------|--------------------|---------------|---------------------------------------------------------------------------------------------------------------|
|        | 3                  |               | GGAACTCAGCTCCTCCACCTCAGCGACCCTTCCGTG<br>TCTGTGATCATAAGCGGACAGTCCGGAAA                                         |
| CIDEC  | NM_178373.<br>3    | 1516-<br>1615 | GTAACCTAAAAGCTCATAGATTCACCAAGCTGGACT<br>TGGGTGAAACCGCGGCTTAGCCTCTCATTGCCTGAA<br>TGGACACAGTTCCTGTTCTCCTGGGAAA  |
| CMA1   | NM_010780.<br>2    | 861-960       | GAGGGAGAATTAAGTCTGGAGCTTTTGCCAGCCTGT<br>GAGGAAATCTGGAAGTGAATAGTGCAGGTTTTGT<br>GTGCCATGCGATCTGGCCTGTCTGTAGTT   |
| COL1A1 | NM_007742.<br>3    | 216-315       | CAATGGTGAGACGTGGAACCCGAGGTATGCTTGA<br>TCTGTATCTGCCACAATGGCACGGCTGTGTGCGATG<br>ACGTGCAATGCAATGAAGAACTGGACTGT   |
| COL1A2 | NM_007743.<br>2    | 4026-<br>4125 | GCTGTGCTTCTGCAGGGTTCCAACGATGTTGAACTT<br>GTTGCTGAGGGCAACAGCAGGTTACCTACTCTGTC<br>CTAGTCGATGGCTGCTCCAAAAAGACAA   |
| COL3A1 | NM_009930.<br>1    | 4371-<br>4470 | CAAGACAGTCTTTGAATATCAAACACGCAAGGCAAT<br>GAGACTACCCATCATAGATATCGCACCTATGACAT<br>TGGGGTCTGATCAAGAATTTGGTGTG     |
| COL4A1 | NM_009931.<br>2    | 6111-<br>6210 | CATGGTGTCTGATAATGAGCCCTGTGCCTGGCGCTT<br>CTTGCTTCTGCTCTGCGTGGAGTATTTTCAGGGTTT<br>GCAACACTAACCACAGACTGAATGACTG  |
| COL4A2 | NM_009932.<br>3    | 5601-<br>5700 | TTGTGGCAAACCTCCTGCCTCAGCTTCCCAGATGCT<br>GGGATTATGGGCATGCGCCACCACACCAGCTTGG<br>TGCTTACTCTTAACTTATTACCTCAGATG   |
| CPM    | NM_027468.<br>1    | 1245-<br>1344 | TATCCAATCCTTCGTGCCCGATGATTCCGCTGTACA<br>AATTCATGCCAAGCCACTCGGCTGCCACAAAGCCTA<br>GTCTGGGCGTGTTCATGACTCTTTT     |
| CRP    | NM_007768.<br>4    | 164-263       | TTGTATTTCCCAAGGAGTCAGATACTTCTATGTGTC<br>TCTGGAAGCAGAGTCAAAGAAGCCACTGAACACCTT<br>TACTGTGTGTCTCCATTTCTACTGTC    |
| CSF1   | NM_0011135<br>30.1 | 834-933       | TCCAGCTGCTGGAGAAGATCAAGAAGTCTTTAATG<br>AAACAAAGAATCTCCTTAAAAGGACTGGAACATTT<br>TTACCAAGAAGTGAACAACAGCTTTGC     |
| CSF2   | NM_009969.<br>4    | 733-832       | CTGAATCCAGCTTCTCAGACTGCTGCTTTTGTGCCT<br>GCGTAATGAGCCAGGAACTTGGAAATTTCTGCCTTAA<br>AGGGACCAAGAGATGTGGCACAGCCACA |
| CTGF   | NM_010217.<br>2    | 2241-<br>2340 | GGCTCAGGGTAAGGTCCGATTCCTACCAGGAAGTG<br>CTTGCTGCTTCTTTGATTATGACTGGTTTGGGGTGG<br>GGGGCAGTTTATTTGTTGAGAGTGTGACC  |
| CTSG   | NM_007800.<br>1    | 786-885       | CTATGGAAGCAACAATGGTAACCCTCCAGCTGTATT<br>CACCAAAATCCAGAGCTTCATGCCCTGGATCAAAG<br>AACAATGAGACGCTTTGCACCAAGATAT   |
| CTSK   | NM_007802.<br>4    | 1201-<br>1300 | GCGCTCCTGAGAGGGACGCAGCGATGCTAACTAAG<br>ATTGTTTCATTTCTCCTCTCGTTGGTGTCTCCAGTGA<br>CAACTTACTTCCCTTCTCTGCCCAG     |
| CTSS   | NM_021281.<br>2    | 741-840       | AGACGCTTCTATCCCTACAAAGCCACGGATGAAAA<br>GTGTCATAACTCAAAAAATCGAGCTGCCACGTG<br>TTCAAGGTACATTCAGCTCCCGTTTGGT      |
| CX3CL1 | NM_009142.<br>3    | 126-225       | CGTTCCTCCATTTGTGTAATCTGCTGCCGGGTGAGC<br>ACCTCGGCATGACGAAATGCGAAATCATGTGCGAC<br>AAGATGACCTCACGAATCCCAGTGGCTTT  |
| CX3CR1 | NM_009987.<br>3    | 2697-<br>2796 | TCCTGTGTTGGTTGTGATAACCATTTCAGAAGTCTCT<br>CCCAGCCTGTTGCTCACGGCGGCATGTCTGATATCT<br>CCTTGGCAGTCTGTATGTTTGTGTCGA  |
| CXCL1  | NM_008176.<br>1    | 561-660       | TGCTAGTAGAAGGGTGTGTCGAAAAGAAGTGCA<br>GAGAGATAGAGTTTAGTATTATGTTTTGTATGTATTA<br>GGGTGAGGACATGTGTGGGAGGCTGTGT    |

|        |                |           |                                                                                                              |
|--------|----------------|-----------|--------------------------------------------------------------------------------------------------------------|
| CXCL10 | NM_021274.1    | 116-215   | AGGACGGTCCGCTGCAACTGCATCCATATCGATGAC<br>GGGCCAGTGAGAATGAGGGCCATAGGGAAGCTTGA<br>AATCATCCCTGCGAGCCTATCCTGCCAC  |
| CXCL11 | NM_019494.1    | 346-445   | TTAAGGCGTCAAACATGTGACATCCTGGGAACGTC<br>TGACTGTGAGCCCTCAATAAGAACTCTGTGCCAGG<br>AACCTGACCCTCTGCTGTCTTGGAACAT   |
| CXCL12 | NM_021704.3    | 260-359   | CTGAAAATCCTCAACTCCAACTGTGCCCTTCAG<br>ATTGTTGCACGGCTGAAGAACAACAACAGACAAGT<br>GTGCATTGACCCGAAATTAAGTGGATCC     |
| CXCL2  | NM_009140.2    | 766-865   | GGTGGGGGTGGGGACAAATAGATGCAGTCGGATG<br>GCTTTCATGGAAGGAGTGTGCATGTTACATCATTT<br>TTTTGTAAGCACCGAGGAGAGTAGAACAGC  |
| CXCL5  | NM_009141.2    | 566-665   | CCCAGTGAAGATAAGAAGAAAGGGCTGATTCTCTCC<br>ACCCACGGATTTTCTTTATGAACTCCCTGCTTTGATG<br>AGAAAAGGGAAACCATTGTCCCTGAAG |
| CXCL9  | NM_008599.2    | 41-140    | TAGAACTCAGCTCTGCCATGAAGTCCGCTGTTCTTT<br>TCCTCTGGGCATCATCTTCTGGAGCAGTGTGGAG<br>TTCGAGGAACCCTAGTGATAAGGAATGC   |
| CYBB   | NM_007807.2    | 1536-1635 | ACAGAAGACTCTGTATGGACGGCCCAACTGGGATA<br>ACGAGTTCAAGACCATTGCAAGTGAACACCCTAACA<br>CCACAATAGGCGTTTTCTGTGTGGCCCT  |
| DCN    | NM_001190451.1 | 1320-1419 | CCAAACACCTTCAGATGTGTCTATGTGCGTTCTGCC<br>ATTCAACTTGAAACTACAAGTAACCCTCAGACGGC<br>CTAATTCTTATAATCTGGAAAAACACCC  |
| DPP4   | NM_001159543.1 | 1304-1403 | AAGAGGGGATCACTATTTATGTGATGTGGTGTGGG<br>CTACAGAAGAAAGAATTTCACTACAGTGGCTCAGGA<br>GGATTCAGAACTATTCCGTGATGGCTATC |
| EDNRA  | NM_010332.2    | 1915-2014 | CGCATGTCATTTCCAACACTTGAAAATTAGAGCTGG<br>GAGAAAGGAGATGATGGTTCAAAGAAGCCACCTAG<br>CTGCCGCTTTGCATGAACACAGAGTTTG  |
| EDNRB  | NM_001136061.2 | 973-1072  | ACAGTGCTGAGTCTTTGTGCTCTAAGTATTGACAGA<br>TATCGAGCTGTTGCTTCTGGAGTCGAATTAAGGA<br>ATTGGGGTTCCAAAATGGACAGCAGTAG   |
| EGFR   | NM_207655.2    | 1336-1435 | TGCTACAAACATCAAACACTTCAAATACTGCACTGC<br>CATCAGCGGGGACCTTCACATCCTGCCAGTGGCCTT<br>TAAGGGGATTCTTTCACGCGCACTCCT  |
| ELANE  | NM_015779.2    | 492-591   | AGGTTGGGCACAAACAGACCATCACCCAGTGTGCT<br>ACAAGAGCTCAATGTGACAGTGGTGACTAACATGTG<br>CCGCCGTCTGTGAACGTATGCACTCTGG  |
| ESM1   | NM_023612.3    | 1006-1105 | GAACTTGAGATGGCCTTGCTGTGATGAGTAATCCA<br>ATCAAAGCTGAAGGACCGACCGGTGGTTTCATTGAC<br>CTGGGTGCACATTCTTATTGTGATACAG  |
| ETS1   | NM_001038642.1 | 741-840   | GAAAGAGGATGTGAAACCATATCAGGTTAATGGAG<br>CCAACCCTACCTACCCAGAATCCTGTTACACCTCGG<br>ATTACTTCATCAGCTACGGTATCGAGCAT |
| F3     | NM_010171.3    | 1171-1270 | AGAGAGGCTGCCTTCATGGCCTGTTACTCCAGCTAA<br>CGCTTTGATTCAAACACTAGCATTTGTCACGTTAGG<br>ACGAACTGAAACGGTACAAACTGGTTAA |
| FASN   | NM_007988.3    | 6561-6660 | TTCTCCTCTGTAAGCTGCGGGCGTGGTAATGCTGGC<br>CAAATAACTACGGCTTCGCCAACTCTACCATGGAG<br>CGTATATGTGAACAGCGCAGGCACGATG  |
| FAIM3  | NM_026976.2    | 191-290   | ATGCCCACTCCCTCAACTACACGTAAGGATGTATCT<br>GTGTCGGCAGATGGCCAAACCTGGGATATGCTCCA<br>CTGTGGTGTCCAACACCTTTGTCAAGAAG |
| FGA    | NM_010196.3    | 1376-1475 | TGGCGATGCCACCGAGTTAGACATATCCCACAGTTT<br>TAGCGGCAGTCTCGACGAACTCTCTGAAAGGCATCC                                 |

|       |                |           |                                                                                                                |
|-------|----------------|-----------|----------------------------------------------------------------------------------------------------------------|
|       |                |           | TGACCTTTCTGGGTTTTTTGACAACCAC                                                                                   |
| FGF2  | NM_008006.2    | 288-387   | CTCTACTGCAAGAACGGCGGCTTCTTCTGCGCATC<br>CATCCCACGGCCGCGTGGATGGCGTCCGCGAGAA<br>GAGCGACCCACACGTCAAACATAACTCC      |
| FGF9  | NM_013518.3    | 1071-1170 | ATTAGCAGTGCCGTCACCTCAGCTCCACTGTTGCCA<br>AACTTTGTCGCATGCATATGAATGATGGAAGCTTGG<br>ATGAGGACTTGCCAATTTGCTCTGCACT   |
| FGG   | NM_133862.1    | 1106-1205 | ACGCAGGCCACCTCAATGGAGTTTATCACCAAGGTG<br>GTACTIONTCAAATCATCTACTACTAATGGTTTCGA<br>CGACGGCATTATTTGGGCGACCTGGAA    |
| FN1   | NM_010233.1    | 2628-2727 | TCCAGACCCTACCGTGGACCAGGTTGATGATACTTC<br>CATTGTTGTTGCGTGGAGTAGACCCAGGCACCTAT<br>CACAGGGTATAGAATTGTCTATTACCT     |
| FOXC1 | NM_008592.2    | 2161-2260 | CCCTGCCAGTCAGTCTCTGTACCGCACGTCCGGGG<br>CTTTCGTCTATGACTGTAGCAAATTTGACCCTATT<br>CCGGCACTCTTAGAGCCAAATGGAATGG     |
| GAPDH | NM_001001303.1 | 891-990   | AGTTTGTCTCCTGCGACTTCAACAGCAAACCTCCACT<br>CTTCCACCTTCGATGCCGGGGCTGGCATTGCTCTCA<br>ATGACAACCTTTGTCAAGCTCATTTCCTG |
| GCG   | NM_008100.3    | 311-410   | GCCCAAGATTTTGTGCAGTGGTTGATGAACACCAAG<br>AGGAACCGGAACAACATTGCCAAACGTGATGATGAA<br>TTTGAGAGGCATGCTGAAGGGACCTTA    |
| GCGR  | NM_008101.2    | 1311-1410 | GCACCCTGCGCTCCACCAAGCTTTTTTTGACCTGT<br>TCCTCAGCTCCTCCAGGGTCTGCTGGTGGCTGTT<br>TCTACTGTTTCTCAACAAGGAGGTGCA       |
| GIPR  | NM_001080815.1 | 469-568   | TGATGGCCAGTGGGGATCTTGAGAGACCACACTC<br>AGTGTGAGAATCCAGAGAAGAATGGGGCTTTTCAG<br>GACCAGACGCTGATCCTGGAGCGCCTGCAG    |
| GLP1R | NM_021332.2    | 408-507   | AGAGAACTTTCTGAGGAACAGCTCCTGTCCCTGT<br>ACATTATCTACACAGTGGGGTACGCACTTTCTTTCT<br>CGCCTTGGTCATCGCTTCAGCCATCCT      |
| GLP2R | NM_175681.3    | 1109-1208 | TGTTATTCCCTGGATTTTGTCCGAGCAAGCCTGGA<br>GAATACAGGGTGTGGGCAGTAAATGAGAATAAGA<br>AAATCTGGTGGATCATCAGAGGACCCATT     |
| GMFG  | NM_001039192.1 | 643-742   | TATCTGCAAAATCTGAGCCTCTTTGTTGGTGCCGCC<br>GGACAGTCCCTACAGTTCCAACCTTTGGCCGGGAGG<br>GGCGGACGTTTCCAGCGAAACCAAGCTG   |
| GREM1 | NM_011824.4    | 1086-1185 | GAGGGCTGCATTAGACTCGGAACTGTTCACTGCTC<br>GCCCTATGCTCCCATAGCCCATCCCTTTCTTTGCTCT<br>CCCTGACATCTCAGTCGTAGCCCATGTT   |
| GUSB  | NM_010368.1    | 1736-1835 | AATACGTGGTCCGAGAGCTCATCTGGAATTTGCGCG<br>ACTTCATGACGAACCAGTCAACGCTGAGAGTAATCG<br>GAAACAAGAAGGGGATCTTCACTCGCCA   |
| GZMB  | NM_013542.2    | 1021-1120 | TTCTGCCACCATGCTGTGACAACCAACTGACATCT<br>TCCTATGGAAGTTTGCCTCTCCACAAAAGAAGTAG<br>AATGTTTGCATTGGAGCTGGGCATGCTC     |
| KIM-1 | NM_134248.2    | 116-215   | CATGTACTTACTCAACATATCGTGGAAATCACAACGA<br>CATGTTGGGGCCGAGGGCAATGCCCATCTTCTGCTT<br>GTCAAATAACACTTATTTGGACCAATGG  |
| HIF1A | NM_010431.2    | 1295-1394 | ACCATGATATGTTTACTAAAGGACAAGTCACCACAG<br>GACAGTACAGGATGCTTGCCAAAAGAGGTGGATAT<br>GTCTGGGTTGAAACTCAAGCAACTGTCAT   |
| HMOX1 | NM_010442.2    | 611-710   | CTGGGGAGGGCCTGGCTTTTTTTACCTTCCCGAACA<br>TCGACAGCCCCACCAAGTTCAAACAGCTCTATCGTG<br>CTCGAATGAACACTCTGGAGATGACACC   |
| HPRT  | NM_013556.     | 31-130    | TGCTGAGGCGGCGAGGGAGAGCGTTGGGCTTACCT                                                                            |

|        |                    |               |                                                                                                               |
|--------|--------------------|---------------|---------------------------------------------------------------------------------------------------------------|
|        | 2                  |               | CACTGCTTTCCGGAGCGGTAGCACCTCCTCCGCCG<br>GCTTCCTCCTCAGACCGCTTTTTGCCGCGA                                         |
| HSPG2  | NM_008305.<br>3    | 6163-<br>6262 | CACGCATTCAGGTGGTCGTCCTCTCAGCTTCGGGTG<br>CCAACCTCAGTGCCAGTCAGGATAGAATCCTCGTCGC<br>CATCCGTGACTGAAGGACAGACGCTTGA |
| ICAM1  | NM_010493.<br>2    | 2196-<br>2295 | CACATGGGTCGAGGGTTTTCTCTACTGGTCAGGATG<br>CTTTTCTCATAAGGGTTCGACTTTTTTACCAGTCACA<br>TAAACACTATGTGGACTGGCAGTGGTTC |
| IFNG   | NM_008337.<br>1    | 96-195        | CTAGCTCTGAGACAATGAACGCTACACACTGCATCT<br>TGGCTTTGCAGCTCTTCTCATGGCTGTTTCTGGCT<br>GTTACTGCCACGGCACAGTCATTGAAAG   |
| IGF1R  | NM_010513.<br>2    | 3391-<br>3490 | CGTATGAGAACTTCATGCATCTGATCATTGCTCTGC<br>CGTTGCCATCCTGCTGATCGTTGGGGGGCTGGTT<br>ATCATGCTGTATGTCTTCCATAGAAAGAG   |
| IGFBP3 | NM_008343.<br>2    | 1646-<br>1745 | ATGTTCTAGGGCACTCTGGGAGCCCATAAGGACAA<br>GGATAAGGACCTTTCTTTGTGAGGCATCTTCTTGAT<br>GACTTGGCCCAGCAGAAAGCCCCAAGTGG  |
| IL10   | NM_010548.<br>1    | 986-<br>1085  | GGGCCCTTTGCTATGGTGTCTTTCAATTGCTCTCA<br>TCCCTGAGTTCAGAGCTCCTAAGAGAGTTGTGAAGA<br>AACTCATGGGTCTTGGGAAGAGAAACCA   |
| IL-11  | NM_008350.<br>2    | 286-385       | GCGCTGGGACATTGGGATCTTTCAGCTTCCTGGT<br>GTGCTGACAAGGCTTCGAGTAGACTTGATGTCCTAC<br>CTCCGGCATGTACAATGGCTGCGCCGTGC   |
| IL12A  | NM_008351.<br>1    | 356-455       | TCATGAAGACATCACACGGGACCAAACCAGCACATT<br>GAAGACCTGTTTACCACTGGAACCTACACAAGAACGA<br>GAGTTGCCTGGCTACTAGAGAGACTTCT |
| IL12B  | NM_008352.<br>1    | 1046-<br>1145 | TCGTAGAGAAGACATCTACCGAAGTCCAATGCAAAG<br>GCGGGAATGTCTGCGTGCAAGCTCAGGATCGCTAT<br>TACAATTCCTCGTGCAGCAAGTGGGCATG  |
| IL13   | NM_008355.<br>2    | 426-525       | AGCTACACAAAGCAACTGTTTCGCCACGGCCCCTTC<br>TAATGAGGAGAGACCATCCCTGGGCATCTCAGCTGT<br>GACTCATTTTTCTTTCTCACATCAGAC   |
| IL17A  | NM_010552.<br>3    | 206-305       | ACCTCAAAGTCTTTAACTCCCTTGGCGCAAAAGTGA<br>GCTCCAGAAGGCCCTCAGACTACCTCAACCGTTCCA<br>CGTCACCCTGGACTCTCCACCGCAATGA  |
| IL18   | NM_008360.<br>1    | 271-370       | ACTTTGGCCGACTTCACTGTACAACCGCAGTAATAC<br>GGAATATAAATGACCAAGTTCTCTTCGTTGACAAAA<br>GACAGCCTGTGTTGAGGATATGACTGA   |
| IL1A   | NM_010554.<br>4    | 226-325       | ACCTCTGAAACGTCAAAGATGTCCAACCTTCACCTTC<br>AAGGAGAGCCGGGTGACAGTATCAGCAACGTCAAG<br>CAACGGGAAGATTCTGAAGAAGAGACGGC |
| IL1B   | NM_008361.<br>3    | 1121-<br>1220 | GTTGATTCAAGGGGACATTAGGCAGCACTCTCTAGA<br>ACAGAACCTAGCTGTCAACGTGTGGGGGATGAATT<br>GGTCATAGCCCGCACTGAGGTCTTTTATT  |
| IL1R1  | NM_0011233<br>82.1 | 821-920       | CTTCTTCGGAGTAAAAGATAAACTGTTGGTGAGGAA<br>TGTGGCTGAAGAGCACAGAGGGGACTATATATGCC<br>GTATGTCCTATACGTTCCGGGGGAAGCAA  |
| IL1RN  | NM_031167.<br>5    | 225-324       | CAACCAGCTCATTGCTGGGTACTTACAAGGACCAAA<br>TATCAAACCTAGAAGAAAAGATAGACATGGTGCCTAT<br>TGACCTTCATAGTGTGTTCTTGGGCATC |
| IL2    | NM_008366.<br>2    | 486-585       | GCAACTGTGGTGGACTTTCTGAGGAGATGGATAGC<br>CTTCTGTCAAAGCATCATCTCAACAAGCCCTCAATA<br>ACTATGTACCTCCTGCTTACAACACATAA  |
| IL22   | NM_016971.<br>1    | 478-577       | AGAAGAATGTCAGAAGGCTGAAGGAGACAGTGA<br>AAGCTTGGAGAGAGTGGAGAGATCAAGGCGATTGG<br>GAACTGGACCTGCTGTTTATGTCTCTGAG     |

|       |                |           |                                                                                                               |
|-------|----------------|-----------|---------------------------------------------------------------------------------------------------------------|
| IL2RA | NM_008367.2    | 326-425   | AAGGAATTGGTCTATATGCGTTGCTTAGGAACTCC<br>TGGAGCAGCAACTGCCAGTGCACCAGCAACTCCCA<br>TGACAAATCGAGAAAGCAAGTTACAGCTC   |
| IL2RB | NM_008368.3    | 2366-2465 | TTATTTTATGTGTTCTTGGGCGATGCTGGTCTATGTA<br>AGGGGTGGGGGCGCGGGGTTGATTGAAGTGAGGG<br>CTCCTTCTATGTTGCTTTGGGGACCTTGT  |
| IL3   | NM_010556.4    | 156-255   | TGCAGCTCTATTGTCAAGGAGATTATAGGGAAGCTC<br>CCAGAACCTGAACTCAAACCTGATGATGAAGGACCC<br>TCTCTGAGGAATAAGAGCTTTCGGAGAG  |
| IL33  | NM_133775.1    | 1012-1111 | ATGACTTACGGCGTTGGTAAAGAACTGAAGGAGA<br>TTCAGCCTTGCTCTTTCCTTTTCTCTGCCTTGAGTCC<br>TGTATGAAATCACACTCACGGACTTCAG   |
| IL4   | NM_021283.1    | 346-445   | TGCTTGAAGAAGAACTCTAGTGTTCATGGAGCTG<br>CAGAGACTCTTTCGGGCTTTCGATGCCTGGATTCA<br>TCGATAAGCTGCACCATGAATGAGTCCA     |
| IL6   | NM_031168.1    | 41-140    | CTCTCTGCAAGAGACTTCCATCCAGTTGCCTTCTTG<br>GGACTGATGCTGGTGACAACCACGGCCTTCCCTACT<br>TCACAAGTCCGGAGAGGAGACTTCACAG  |
| IL7   | NM_008371.2    | 1056-1155 | AAACATTCATTGGTGAACCACTGGGGGAGTGGAAC<br>TGTCTGTTTTAGACTGGAGATACTGGAGGGCTCAC<br>GGTGATGGATAATGCTCTTGAAAACAAGA   |
| INSR  | NM_010568.2    | 1083-1182 | CACTGTCATCAATGGGCAGTTTGTGGAACGGTGCT<br>GGACACACAGTCATTGTCAGAAAGTTTGCCCAACCA<br>TCTGTAAGTCACATGGCTGCACAGCTGAA  |
| IRS1  | NM_010570.4    | 2136-2235 | CCACTTCAGACTGTCTTCCCAGGGCGCTCTAGTG<br>CTTCCGTGTCCGTTTCGCCTAGCGATGGCGGTTTCA<br>TCTCTTCTGATGAGTATGGTTCTAGTCC    |
| IRS2  | NM_001081212.1 | 3877-3976 | GGCACTGGAGCTTTGCCCTCTGCCAGCACCTATGCA<br>AGCATCGACTTCCCTGTCCCATCACTTGAAGGAAGCC<br>ACAGTCGTGAAAGAGTGAAGCGCTACCA |
| ITGA1 | NM_001033228.3 | 2551-2650 | ATTGAAGTCTAAAGAAGACTCAGTTTACGAGGCTGA<br>TCTGCAGTACCGTGTCAACCCTTGATTGCTGAGGCA<br>GATATCACGGAGCTTTTTTTCTGGAAC   |
| ITGA3 | NM_013565.2    | 1066-1165 | AAGGACTGGGATTTATCTGAATATAGCTACAGGGGC<br>TCAGAGGAGCAAGGAAACCTTTATATTGGGTACACG<br>GTGCAGGTAGGCAACGCCATCCTACATC  |
| ITGA4 | NM_010576.3    | 6601-6700 | AATTTGTTGAGACCACTGGTCACTTGGACAGTCCCT<br>TACTTCAACAGGGTGGAGCTTTGATCTTCAGGCTAC<br>TGGCCTTAGTCATCTGACAAGACTTAGA  |
| ITGA5 | NM_001314041.1 | 2623-2722 | CCTCAGCAAGAACCTGAACAACCTCACAAAGCAACGT<br>GGTCTCCTTCCCACTCTCGGTGGAGGCTCAAGCCCA<br>GGTCTCCCTTAATGGTGTCTCCAAGCCT |
| ITGAM | NM_001082960.1 | 3026-3125 | ATCCCTGTTTCAAGTCAACAATGTGACCGTATGGGAT<br>CATCCCCAGGTCATCTTCTCCCAGAACCTCTCAAGT<br>GCCTGTCACACTGAGCAGAAATCCCCC  |
| ITGAX | NM_021334.2    | 328-427   | GGGCCTGTCCCTTGCTGCTGCCACCAACCCTTCTTG<br>GCTGTTGGCTTGTGGTCTACTGTGCACCACACATG<br>CAGAGAGAATATATACTTGACAGGGCTC   |
| ITGB1 | NM_010578.1    | 1856-1955 | CTGTGATAGGTCTAATGGCTTAATTTGTGGAGGCAA<br>TGCGGTGTGCAGGTGTCGTGTTTGTGAATGCTATCC<br>CAATTACACTGGCAGTGCATGTGACTGT  |
| ITGB2 | NM_008404.4    | 2543-2642 | GCTCGGTTTCTTCCGCCATTATATCAAGTCTGCCA<br>GGGTTTCCAGGGACTTGTCTTCCGACCTGCACAATC<br>TTGCCGCAGAGCCCTAAGAATTGTCCCG   |
| KCP   | NM_001029985.4 | 595-694   | GCCGGCCAGGCTGTGAATATGAAGGGCAGCTTAC<br>CAGGAAGGGTCTAGTTTCTTGCCAGTTCCAACCCA                                     |



|        |                    |               |                                                                                                              |
|--------|--------------------|---------------|--------------------------------------------------------------------------------------------------------------|
|        |                    |               | TGCCTCCAGTGCTCTTGCCTGAGGAGCCT                                                                                |
| NEPH1  | NM_0011709<br>85.1 | 1247-<br>1346 | CTTGATTGAAGACGCCCATGAGAGTCGCTATGAGAC<br>AAACGTTGACTATTCCTTCTTCACGGAGCCTGTGTC<br>TTGTGAGGTTTATAACAAAGTCGGGAGC |
| NEPH2  | NM_0011909<br>14.1 | 113-212       | TCCGAGTGGGCACATTGCTAAGGATCCCGGCTTCC<br>CGAGGCGACTGAAAACAAGCATTTGGTTTCGGCTG<br>CCTGCAGATACCCGGAGACACAACGAGACC |
| KITL   | NM_013598.<br>1    | 281-380       | CTGCGGGAATCCTGTGACTGATAATGTAAAAGACAT<br>TACAAAAGTGGTGGCAAATCTTCAAATGACTATAT<br>GATAACCCTCAACTATGTGCGCCGGGATG |
| KLF2   | NM_008452.<br>2    | 106-205       | ACCCGAGGCGGGCGGCACGGATGAGGACCTAAAC<br>AACGTGTTGGACTTCATCCTCTCCATGGGATTGGAC<br>GGTCTGGGCGCCGAAAATCCTCCCGAGCCC |
| KLF4   | NM_010637.<br>3    | 2398-<br>2497 | GACTGGAAGTTTGTGGATATCAGGGTATACACTAAA<br>TCAGTGAGCTTGGGGGGAGGGAAGACCAGGATTCC<br>CTTGAATTGTGTTTCGATGATGCAATACA |
| KRT18  | NM_010664.<br>1    | 10-109        | GAACTCCTGTTCTGGTCTCTCGCTTCGCTCTCCTCTC<br>CAGACAAGATGAGCTTCACAACTCGCTCCACCACCT<br>TCTCCACCAACTACCGGTCCCTGGGCT |
| KRT8   | NM_031170.<br>2    | 1490-<br>1589 | CGCACCACCAAGGCTGTGGTTGTGAAGAAGATTGA<br>AACCCGAGATGGGAAGCTGGTGTCCGAGTCTTCTG<br>ATGTCGTGTCCAAGTGAATGGCCACTGAAG |
| LAMB1  | NM_008482.<br>2    | 1971-<br>2070 | GAGTCATTGTGGTGGAAAGGCAGTACATTGAGGAC<br>CGCATTCTTCTGGACAGGACCTGGGTTTCGTCCG<br>GGTGCCTGAAGGGGCTTATTTGGAGTTTTT  |
| LAMC1  | NM_010683.<br>2    | 1046-<br>1145 | GTTCTCAAGTCTTACTATTACGCAATCTCAGACTTTG<br>CTGTGGGCGGCAGGTGTAATGTAACGGACATGCC<br>AGCGAGTGTGTAAGAACGAGTTTGACA   |
| NGAL   | NM_008491.<br>1    | 191-290       | GCAGGCAATGCGGTCCAGAAAAAACAGAAGGCAG<br>CTTTACGATGTACAGCACCATCTATGAGCTACAAGA<br>GAACAATAGCTACAATGTCACCTCCATCC  |
| LEP    | NM_008493.<br>3    | 1116-<br>1215 | CCTATTGATGGGTCTGCCAAGGCAAACCTAATTTT<br>TGAGTGACTGGAAGGAAGGTTGGGATCTTCCAAAC<br>AAGAGTCTATGCAGGTAGCGCTCAAGCTT  |
| LEPR   | NM_010704.<br>2    | 3187-<br>3286 | TGTTCTGGGCACAAGGACTGAATTTCCAAAAGGTC<br>ACTGTTTAAGTATTTTAACCCAGATATCTAAGGTTGC<br>AGTTTAGATGCCACAGTACTTACAGAT  |
| LEPR   | NM_146146.<br>2    | 3999-<br>4098 | TCACAAGATAATGGAGAATAAGATGTGTGACTTAAC<br>TGTGTAATCTCATCCAAGAAGCCTCAAGGTTCCATT<br>CCAGTAGAGCCTGTCATGTATAATGTGT |
| LGALS3 | NM_0011459<br>53.1 | 1006-<br>1105 | CATCCATTTAATAAAGTCTCATGCTGAGAGATACCC<br>ATCGCTTTGGGGGTTTTTATGATACTGGATGTCAA<br>TCTTAGGACTGCTCGTGACTGCTAGGCA  |
| LIF    | NM_008501.<br>2    | 3436-<br>3535 | ACATCTTTCACCTGGAAGCATTGACTTCCACCGAGC<br>ATAGTAGGTAGTGTGTCTGGACCAGAGAAAAAGGG<br>ATGGGGCATTGTCAGTTTATCCAGAGAG  |
| LOXL2  | NM_033325.<br>2    | 3701-<br>3800 | TTCCACTTGGCGCTCTGGTCTTCCAAACTCCCACCA<br>CAATAACCCATTGAGTTCTGTTCTCTAAAAGCGCTCT<br>AGGGCTTCTGGACCCAAAGTTCTAAGT |
| LPL    | NM_008509.<br>1    | 2806-<br>2905 | CCATGCTGTAACCAAGTCTGGCCTAGAATAAATA<br>TGTATTTGAGGCTGGCCTGAACTCTCAACCATCCT<br>GCCTTAGCTTCTGTGTCCTGGGAGCTT     |
| LY6C1  | NM_010741.<br>3    | 52-151        | AACCCTTCTGAGGATGGACACTTCTCACACTACA<br>AAGTCCTGTGTGCTCATTCTTCTGTGGCCCTACTG<br>TGTGCAGAAAGAGCTCAGGGACTGCAGT    |
| MEF2C  | NM_0011705         | 4342-         | TTCTACTACTAAAGGTATCAATGGAACATGAAGACG                                                                         |

|        |                    |               |                                                                                                               |
|--------|--------------------|---------------|---------------------------------------------------------------------------------------------------------------|
|        | 37.1               | 4441          | AGTATTTAGGCAGAAGCAAAACAGGAAACCATCCTT<br>ACAAACATGCTTACCTGCACATCTGTTT                                          |
| MMP12  | NM_008605.<br>3    | 593-692       | AAGGTGGTACACTAGCCCATGCTTTTTATCCTGGAC<br>CTGGTATTCAAGGAGATGCACATTTTGATGAGGCAG<br>AAACGTGGACTAAAAGTTTTCAAGGCAC  |
| MMP13  | NM_008607.<br>1    | 191-290       | ACAGTGACCTCCACAGTTGACAGGCTCCGAGAAAT<br>GCAATCTTTCTTTGGCTTAGAGGTGACTGGCAAAT<br>TGATGATCCCACCTTAGACATCATGAGAA   |
| MMP14  | NM_008608.<br>3    | 555-654       | AGTTTGGGACTGAGATCAAGGCCAATGTTTCGGAGG<br>AAGCGCTATGCCATTCAGGGCCTCAAGTGGCAGCA<br>TAATGAGATCACTTTCTGCATTCAGAATTA |
| MMP1A  | NM_032006.<br>3    | 955-<br>1054  | ACATTCGGGTAAATAGATTCATGCCAGAACCTGAGC<br>TCAATTTAATAGGTATTCTCTGGCCAAATCTTCCAGT<br>TAAACTTGACGCTGCTTATGAAGCTAG  |
| MMP2   | NM_008610.<br>2    | 2377-<br>2476 | AGTTAACAGCCTTCTCCTTCACCTGGTGACTTCAG<br>ATTTAAGAGGGTGGCTTCTTTTTGTGCCAAAGAAA<br>GGTGCTGACTGTACCCTCCCGGGTGCTG    |
| MMP3   | NM_010809.<br>1    | 1576-<br>1675 | TCTTTGTGAAAGGAAGTGCTTTGTTTCAGCATGTGCT<br>ATGGCAGAACCAAACAGGAGCTATGGATGACACCA<br>GTCAACGTCAAGTTGTCAAAGGATGTTCA |
| MMP7   | NM_010810.<br>4    | 351-450       | CACCTACAGAATTGTATCCTATACTTCAGACTTACCT<br>CGGATCGTAGTGGATCAAATCGTGAAAAAAGCTCTC<br>AGAATGTGGAGTATGCAGATCCCCTG   |
| MMP8   | NM_008611.<br>4    | 2286-<br>2385 | GGAGGGCTGTATCTATAAATCTATTTGCCAATAAGT<br>TCCAGGCAGAGGCAGGTAGGAGGGGTTTAAAAAA<br>AAGGACCATTCTTTCTCAAGCACATTCC    |
| MMP9   | NM_013599.<br>2    | 1571-<br>1670 | CCTCTACAGAGTCTTTGAGTCCGGCAGACAATCCTT<br>GCAATGTGGATGTTTTTGATGCTATTGCTGAGATCC<br>AGGGCGCTCTGCATTTCTTCAAGGACGG  |
| MPO    | XM_0065324<br>04.1 | 1389-<br>1488 | CAGTACCGATCTTACAACGACTCAGTAGACCCTCGA<br>ATCGCCAATGTCTTACCAACGCTTCCGTTATGGC<br>CACACCCTCATCCAACCCTTCATGTTCC    |
| MRC1   | NM_008625.<br>1    | 3993-<br>4092 | GTTCCGAAATGTTGAAGGGAAGTGGCTTTGGTTGAA<br>CGACAATCCTGTCTCCTTTGTCAACTGGAAAACAGG<br>CGATCCCTCTGGTGAACGGAATGATTGT  |
| MSR1   | NM_0011133<br>26.1 | 556-655       | GATTTTCGTAGTCCAGGAACATGGGAATTCCTGGA<br>TGCAATCTCCAAGTCTTGCAGAGTCTGAATATGAC<br>ACTGCTTGATGTTCAACTCCATACAGAA    |
| MTOR   | NM_020009.<br>2    | 2433-<br>2532 | CATGGAGCCTATCCTGAAGGCTTTAATTTTGAAACT<br>GAAAGATCCAGACCCTGACCCAAACCCGGGCGTGA<br>TCAATAACGTGTTGGCCACTATAGGAGAA  |
| NFE2L2 | NM_010902.<br>3    | 1666-<br>1765 | CCAAGGAGCAATTCAATGAAGCTCAGCTCGCATTGA<br>TCCGAGATATACGCAGGAGAGGTAAGAATAAAGTC<br>GCCGCCAGAACTGTAGGAAAAGGAAGCT   |
| NFKB1  | NM_008689.<br>2    | 2126-<br>2225 | GTCTTACACTTAGCCATCATCCACCTCCACGCTCAG<br>CTTGTGAGGGATCTGCTGGAAGTCACATCTGGTTTG<br>ATCTCTGATGACATCATCAACATGAGAA  |
| NGF    | NM_0011126<br>98.1 | 631-730       | CAAGGAGGTGACAGTGCTGGCCGAGGTGAACATTA<br>ACAACAGTGTATTCAGACAGTACTTTTTTGAGACCA<br>AGTGCCGAGCCTCCAATCCTGTTGAGAGT  |
| NID1   | NM_010917.<br>2    | 735-834       | AAAGCCAAGTACCTGCTGTGGTTGGTTTCAGCAAAG<br>GTCTAGTAGGATTTCTATGGAAGAGCAACGGAGCCT<br>ATAACATATTTGCCAATGACAGAGAATC  |
| NID2   | NM_008695.<br>2    | 2587-<br>2686 | GGCCCTAATTCTGTGTGTGTCAACTTGGTGGGAAGC<br>TACAGGTGTGAATGCCGCAGTGGCTATGAATTTGCA<br>GATGACCAGCACACTTGTATCTTGATCG  |

|        |                |           |                                                                                                               |
|--------|----------------|-----------|---------------------------------------------------------------------------------------------------------------|
| NLRP3  | NM_145827.3    | 509-608   | ACGTGTACATCACATTCTCTATGGTATGCCAGGAG<br>GACAGCCTTGAAGAAGAGTGGATGGGTTTGCTGGG<br>ATATCTCTCCCGCATCTCCATTTGTA AAA  |
| NOS2   | NM_010927.3    | 3716-3815 | CCCCCTCCTCCACCCTACCAAGTAGTATTGTACTAT<br>TGTGGACTACTAAATCTCTCTCCTCTCCTCCCTCCCC<br>TCTCTCCCTTTCTCCCTTCTTCTCC    |
| NOS3   | NM_008713.4    | 3614-3713 | ATACCTGGTTCCTGACAGTCTTCTCCCTCCAGTT<br>CCCGAAAGAGGGATTGTGTCACTTCGTTTCGGTTG<br>ACCAAGGCTAGCCACCCTCTCTGAAGAAT    |
| NOX1   | NM_172203.1    | 476-575   | CTCCAAACATGACAGTGATGTATGCAGCATTTACCA<br>GTATTGCTGGCCTTACTGGAGTGATTGCCACTGTAG<br>CTTTGGTTCTCATGGTAACGTCAGCTAT  |
| NOX3   | NM_198958.2    | 1241-1340 | CAGATGTATTTCACTACCCCGTGAGCGTGTGCATTG<br>CAACGGGAATTGGAGTCACTCCCTTCGCCTCTCTTC<br>TGAAGTCTGTGTGGTATAAGTGTGTGA   |
| NOX4   | NM_015760.4    | 501-600   | TCCAGAAAGCTTCTCTTCAACAACCATTCTGGTCT<br>GACGGGTGTCTGCATGGTGGTGGTATTGTTCTCAT<br>GGTTACAGCTTCTACCTACGCAATAAGA    |
| NPHS1  | NM_019459.2    | 382-481   | TGGAAGGAGACAGTGCTAAAGGTGAGTTCCACCTG<br>CTTATTGAAGCCTGTGACCTCAGCGATGATGCGGAG<br>TACGAGTGCCAAGTCGGCCGCTCCGAGTT  |
| NPHS2  | NM_130456.3    | 551-650   | GGTTGATCTCCGTCTCCAGACCTTGGAAATACCTTT<br>CCATGAGGTGGTAACCAAGATATGTTTATAATGGA<br>GATAGACGCTGTCTGCTACTACCGCATG   |
| NPNT   | NM_001029836.1 | 2651-2750 | ATGGTGACCTGTCATCTATGCTATGACTTAAACCAG<br>CAGCAAGAAAAGTGGCAAAGGTGTGCGGCTTGGGG<br>TAGTGTGATGATGGCTTTGTTTCTGTGTC  |
| OLR1   | NM_138648.1    | 1491-1590 | TGCCTCCTGTTGCTGCATGAAAGACAGGATGTAGAA<br>ATCCTCCTCAAGTGCAGGCAGAGGGCTCAAAGGCA<br>AAGCTCGTCCGAGAAATAACATGCAAAGA  |
| OSM    | NM_001013365.2 | 580-679   | CACGGTCCACTACAACACCAGATGTCTTTAATACCA<br>AGATAGGCAGCTGTGGCTTTCTCTGGGGATAACCATC<br>GCTTCATGGGCTCAGTGGGGAGGGTCTT |
| PCSK9  | NM_153565.2    | 2789-2888 | CAGGAAGATCATAATGGACAGAGATCCTTGGAGGT<br>TCAAAGACCAAGTACCAGACTGGAAAATTGAGTCTG<br>AAAGCCACAAGGACAGTCAACTCACAGCC  |
| PDGFA  | NM_008808.3    | 806-905   | TGTGCGTGCGGTGTGACATTCTGAACATACTATGT<br>ATGGTGCTTCATTGCCAATGTGCGTGCAGTCTTTGT<br>TCTCCTCCGTGAAAAGTGTGTCCGAGG    |
| PDGFB  | NM_011057.3    | 2326-2425 | AGCAAGGTTGTAATGGGATGTATATTGCACATGATG<br>CACTGCGTGTGGAGACTGCTGTTACACCCTAAATA<br>TGCCAACCTGCCTATTATGACGTTCTG    |
| PDGFC  | NM_019971.2    | 1166-1265 | GTTGTCACTATATCTGGTAATGGGAGCATCCACAGC<br>CCGAAGTTTCTCATAACATACCCAAGAAATATGGTG<br>CTGGTGTGGAGATTAGTTGCAGTAGATG  |
| PDGFD  | NM_027924.2    | 157-256   | ACGCGATCCCTAGGTCGCTGAGCCCAAATGCAACG<br>GCTCGTTTTAGTCTCCATTCTCCTGTGCGGCAACTTT<br>AGCTGCTATCCGGACACTTTTGCGACTC  |
| PDGFRB | NM_008809.1    | 1186-1285 | CTCAAGGACAACCGTACCTTGGGTGACTCCGGCGC<br>TGCGCAGTTAGTTTTGTCTACTCGCAACATGTCTGA<br>GACCCGGTACGTGTCAGAACTGATCCTGG  |
| PECAM1 | NM_008816.2    | 1101-1200 | ACACCTGCAAAGTGGAAATCAAACCGTATCTCCAAAG<br>CCAGTAGCATCATGGTCAACATAACAGAGCTGTTTC<br>CCAAGCCGAAGTTAGAGTTCTCCTCCAG |
| PLA2G5 | NM_001122954.1 | 1541-1640 | AGCCCTGGCTTCTGGCAGCTGTATGGTCTTTTAAAC<br>CTTTGGATAGTCCGAATCTCTCTGGCTCTCCTCAA                                   |

|         |                |           |                                                                                                               |
|---------|----------------|-----------|---------------------------------------------------------------------------------------------------------------|
|         |                |           | ATATAAAACAAGGCTCCTTCCAGGAGTA                                                                                  |
| PLAT    | NM_008872.1    | 646-745   | CCCTGGTGCTATGTCTTTAAGGCAGGGAAGTATACC<br>ACGGAGTTCTGTAGCACACCAGCTTGCCTAAGGG<br>AAAAAGCGAGGACTGCTATGTTGGGAAAG   |
| PLAU    | NM_008873.2    | 1951-2050 | CAAGTCTAGGTATTTCCCTAACTCCAGACTGTGATG<br>CGGGGCCATTTGGTCTTCCATGTGATGCTCCACGTG<br>AATGTATCATTCCCGGGCGTGACCCGTG  |
| PLAUR   | NM_011113.3    | 1086-1185 | TTCTTTGGACCTCAGTTTTTCCATGAACCAGAAGAG<br>AATTGGAACAAGGGCTGCGGGCAGCAGGGGCCTCT<br>TAGTTGAGATAATATTGTTGCTGTTATTA  |
| PLIN2   | NM_007408.3    | 197-296   | TGCCCTTGGTGAGCTCTACCTACGACCTTGTGTCCT<br>CCGCTTATGTCAGTACAAAGGATCAGTACCCGTATT<br>TGAGATCCGTGTGTGAGATGGCCGAGAA  |
| PLIN4   | XM_006524705.2 | 2217-2316 | GATACTAGCCAGAGAGTGCTGACAGGCACAAAGGA<br>CAATGTATATGCTGGGGTCACTGGTGCAGTAAATGT<br>GGCAAAGGTACCATCCAGGGCGGCTTGG   |
| PLIN5   | NM_001077348.1 | 1584-1683 | CCCCTGGTGGTCATGTGACAGCACTCACGCAGGCT<br>AGGGCTTCTGTTCCCTTCCCTGCCCTGGATGATTTT<br>GAGGTCTAAGTGGACCTCAGCAGGTCACT  |
| PODX1   | NM_013723.3    | 2801-2900 | GATCTAACCTACCAGGCATTATTATTATCCACAGG<br>AAGCTCAGGGACTTTTCAAGTTGCTGAGAGCTTGGG<br>TTGGTGTGCTGTGGTGTGTTGTGTGTGT   |
| PPARA   | NM_011144.2    | 1346-1445 | GGACTTGAACGACCAAGTCACCTTGCTAAAGTACGG<br>TGTGTATGAAGCCATCTTCACGATGCTGTCCTCCTT<br>GATGAACAAAGACGGGATGCTGATCGCG  |
| PPARG   | NM_011146.1    | 1061-1160 | ACCAAGTGACTCTGCTCAAGTATGGTGTCCATGAGA<br>TCATCTACACGATGCTGGCCTCCCTGATGAATAAAG<br>ATGGAGTCCCTCATCTCAGAGGGCCAAGG |
| PPIA    | NM_008907.1    | 391-490   | CCAAGACTGAATGGCTGGATGGCAAGCATGTGGTC<br>TTTGGGAAGGTGAAAGAAGGCATGAACATTGTGGA<br>AGCCATGGAGCGTTTTGGGTCCAGGAATGG  |
| PRF1    | NM_011073.2    | 1351-1450 | ACAGCTACTGATGCCTACCTAAAGGTCTTCTTTGGT<br>GGCCAGGAGTTCAGGACCGGTGTCGTGTGGAACAA<br>TAACAATCCCCGGTGGACTGACAAGATGG  |
| PROCR   | NM_011171.1    | 306-405   | GCCTGCAGATCTATCTGACCCAGTTCGAAAGCCTGG<br>TGAAGCTGGTATATCGCGAGCGCAAGGAGAACGTG<br>TTCTTTCTCTCACTGTTAGCTGCTCCCT   |
| PRTN3   | NM_011178.2    | 641-740   | GCAATGGCATTCTTCATGGAGTGGACTCCTTCGTGA<br>TCCGCGAATGCGCCTCCCTCCAGTTCCTGATTTCT<br>TCGCCCGGGTGTCCATGTATGTGGACTG   |
| PTGIR   | NM_008967.3    | 1732-1831 | GGTTCTATGGCTCTCAAGAAGGATTCTCTCAAATA<br>ACCAGGGCCTGGGCAGGCTGCTCTGGCCCCTGGGC<br>TCCTCCATCCATCTCTGTCTAAATATT     |
| PTGIS   | NM_008968.3    | 1065-1164 | CACGGTCTGGCAAGCAGAGCAGCCTGTTTCACAGA<br>TGACCACACTCCCACAGAAGATTCTAGACAGCATGC<br>CTGTGCTAGACAGTGTGCTCAATGAGACA  |
| PTGS2   | NM_011198.3    | 676-775   | CCATCAGTTTTTCAAGACAGATCATAAGCGAGGACC<br>TGGGTTACCCGAGGACTGGGCCATGGAGTGGACT<br>TAAATCACATTTATGGTGAAACTCTGGAC   |
| RASGRP3 | NM_001166493.1 | 941-1040  | CATGGCTGTCTGGAGAATAACCCGACATTGGAGAG<br>ATCTATTGCTTTATTTAATGGAATCTCTAAGTGGGTC<br>CAGTTGATGGTTCTTAGCAAACCAAGTG  |
| REN1    | NM_031192.3    | 26-125    | GAACCAGATGGACAGAAGGAGGATGCCTCTCTGGG<br>CACTCTTGTTGCTCTGGAGTCTTGCACCTTCAGTC<br>TCCAACACGCACCGCTACCTTTGAACGA    |
| REN2    | NM_031193.3    | 18-117    | CTTTCATGGTCCCACAGGCCCTGGGGTAATAAATCA                                                                          |

|              |                 |               |                                                                                                               |
|--------------|-----------------|---------------|---------------------------------------------------------------------------------------------------------------|
|              | 2               |               | GAGCAGAGCCTGTGATACATGGTGTGTATAAAAAGA<br>AGGCTCAGGGGGTCTGGGCTACACAGCTC                                         |
| RETNLB       | NM_023881.<br>3 | 530-629       | GGCCTCTGCCCCGCTGCTGCCGAATGGTTTAAAGAAT<br>GAGGAGGTTGAGAAACCAATTTCAAATGATGAGCA<br>TAATGAAACCACGGTCTCGACCAGGAAAC |
| RPS18        | NM_011296.<br>2 | 421-520       | CAGCACACCAAGACCACTGGCCGCAGGGGCCGAAC<br>TGTGGGTGTATCCAAGAAGAAATGAGTCTCTGGGC<br>CTTTGCTGTTAATAAATAGTTTATATACCT  |
| S100A8       | NM_013650.<br>2 | 281-380       | ATAAAAGTGGGTGTGGCATCTCACAAAGACAGCCA<br>CAAGGAGTAGCAGAGCTTCTGGCCTAGGGCTGGGT<br>CCCTGGATATGTCTACAGAATAAAGTCATC  |
| S100A9       | NM_009114.<br>2 | 358-457       | AAAGGCTGTGGGAAGTAATTAAGAGGTCAGCCATG<br>TGACAGCTGCCCAACCAAGTCTAAAGGGAATGGCTT<br>ACTCAATGGCCTTTGTTCTGGGAAATGAT  |
| S1PR1        | NM_007901.<br>4 | 851-950       | CTGCCCAGTGGTTTCTGCGGGAAGGGAGTATGTTT<br>GTGGCTCTCTGTCATCAGTCTTCAGCCTCCTTGCC<br>ATCGCCATTGAGCGCTACATCACCATGCT   |
| SAA1         | NM_009117.<br>3 | 352-451       | GGCAAAGACCCCAATTACTACAGACCTCCTGGACTG<br>CCTGACAAATACTGAGCGTCCTCCTATTAGCTCAGT<br>AGTTTGTGCTGGGGGCCTGAGGGTGGGG  |
| SAA2         | NM_011314.<br>2 | 342-441       | ACATGGCCGCAGTGGCAAAGACCCCAATTACTACA<br>GACCTCCTGGACTGCCTGCCAAATACTGAGAGTCCT<br>CCTATTAGTTCAGAAGGCTGTGTTGGGGT  |
| SAA3         | NM_011315.<br>3 | 253-352       | TAAAGTCATCAGCGATGCCAGAGAGGCTGTTTCAGA<br>AGTTCACGGGACATGGAGCAGAGGACTCAAGAGCT<br>GACCAGTTTGCCAATGAGTGGGGCCGGAGT |
| SAA4         | NM_011316.<br>3 | 1625-<br>1724 | CGAAACAAAAGTCTGCTTTCCGCTCTAGAAGGGAAG<br>CAAGACACAACATCACTGAGCGGGAGTAAATGAATT<br>GGTCCCTCATAAAGCAAAGGCATTCTT   |
| SCARB1       | NM_016741.<br>1 | 671-770       | CCTTGGCGCTGGTCACCATGGGCCAGCGTGCTTTTA<br>TGAACCGCACAGTTGGTGAGATCCTGTGGGGCTAT<br>GACGATCCCTTCGTGCATTTTCTCAACAC  |
| SELE         | NM_011345.<br>2 | 2576-<br>2675 | TCAGTGGCTGCCGAAGTATTCTTGAACATTGTGTTT<br>TGTGTCTGGCACTGAAGCCAGCATGAGATCCATCA<br>TTCTTATGTCAGCTCAAGGGTCAAAGG    |
| SELP         | NM_011347.<br>1 | 1571-<br>1670 | TGGATTGTTCTCATGTCCACGGAGAGTTTGGTGTG<br>GCTCTATCTGTCACTTCTCCTGCAATGAGGACTTTG<br>AGCTACTGGGATCTGAAAATGTGGAATG   |
| SERPIND<br>1 | NM_008223.<br>3 | 766-865       | TCGAAAGCTGACCCATCGTCTATTGAGGAGGAATTT<br>TGGGTACACACTTCGGTCAGTTAATGGCCTTTATAT<br>TCAGAAGCAGTTTCCCATACGGGAGGAC  |
| SERPINE<br>1 | NM_008871.<br>2 | 1823-<br>1922 | AGGGGCAACGGATAGACAGATCAAATGGTGGCCCA<br>ATAGCGAGCCTTCTCCCTGCTCCCTCCCTTGACACA<br>GCTTGCTTATGTTATTTAGAGTGTAGGT   |
| SH2D1A       | NM_011364.<br>3 | 251-350       | TTGTATCAAGGTTACATCTACACATATCGAGTGTCC<br>CAGACAGAAACAGGTTCTTGGAGTGCCGAGACAGC<br>ACCTGGAGTACATAAAAGATTTTTCCGGA  |
| SLC27A4      | NM_011989.<br>4 | 2981-<br>3080 | TAGCCCCTTTTCGCTTAGCCCTTGGGATAAGCCCTTA<br>GCCAGTCTCTTTTCAAAGCTCTGCCTTCTATAAC<br>TCCTTAGGAGAGACTCCCACCAGATCT    |
| SMPDL3<br>A  | NM_020561.<br>2 | 1067-<br>1166 | TGTTTTGTGGCACCTGCTGTTACACCAAGTAAAGGAG<br>TTTTACAAAAGGAGACCAACAATCCCGGTGTCCGCC<br>TATTTAGTACAAGCCTGGTGATTACAC  |
| SNAI1        | NM_011427.<br>2 | 911-<br>1010  | TCACTGCCAGGACTCCTTCCAGCCTTGGTCCGGGG<br>ACCTGTGGCGTCCATGTCTGGACCTGGTTCTGCTT<br>GGCTCTTTGGTGGCCTTTGCCGCAGGTG    |

|        |                |           |                                                                                                               |
|--------|----------------|-----------|---------------------------------------------------------------------------------------------------------------|
| SNAI2  | NM_011415.2    | 816-915   | AGACCCACTCTGATGTAAAGAAATACCAAGTGCAAAA<br>ACTGCTCCAAAACCTTCTCCAGAATGTCGCTTCTGC<br>ATAAACATGAGGAGTCTGGCTGCTGTGT |
| SOX17  | NM_011441.4    | 2151-2250 | ACTGAGCTCCTAGGGGAGGTGGACCGCACGGAATT<br>CGAACAGTATCTGCCCTTTGTGTATAAGCCCGAGAT<br>GGGTCTTCCCTACCAGGGACACGACTGCG  |
| SOX7   | NM_011446.1    | 2486-2585 | TAGAAACCTAAAACGTCTGTCCACAAAAGTGTTGGG<br>GTGTGCTGATTTCTAGAGCAGAGCTGTAGCATACTC<br>TTATCTACAGATGCAAAAGATGACTCTC  |
| SPP1   | NM_009263.3    | 421-520   | TGAATCTGACGAATCTCACCATTTCGGATGAGTCTGA<br>TGAGACCGTCACTGCTAGTACACAAGCAGACACTTT<br>CACTCCAATCGTCCCTACAGTCGATGTC |
| SPRY1  | NM_011896.2    | 1611-1710 | GAGCAGCGAGGGCCTGTGTGCTGCATCCGCTCTCC<br>AGCTGCTTCCGTGAAGATATACGCATGCCCGGATTT<br>GGCCGAGAGTTGTTTGGGGTCTGGTACTG  |
| SYK    | NM_011518.2    | 3971-4070 | TGATAGGGAGGCACTATGCTTAGAGCATGGTTAGG<br>AAGTATTTAGAAGCTATTGGTGTGTCTTGGAAATTGT<br>GTTAGTAGGTCAACCGTCTGTGGAGGGA  |
| SYNPO  | NM_177340.2    | 1099-1198 | CGCCCACTAAGGTGTATAGTGAAGTACATCTCACAC<br>TAGCCAAGCCTGCATCCGTGGTCAACAGGACCGCC<br>AGGCCTTTTGGGATCCAGTCGCCAGGGAC  |
| TAGLN  | NM_011526.2    | 421-520   | GTTGACCTCTATGAAGGTAAGGATATGGCAGCAGT<br>GCAGAGGACTCTAATGGCTTTGGGCAGTTTGGCTG<br>TGACCAAAAACGATGGAAACTACCGTGGAG  |
| TBP    | NM_013684.3    | 71-170    | GTGGCGGGTATCTGCTGGCGGTTTGGCTAGGTTTC<br>TGCGGTCGCGTCATTTTCTCCGCAGTGCCACGATC<br>ACTATTTTATGGTGTGTGAAGATAACCCA   |
| TFRC   | NM_011638.3    | 1931-2030 | CTGAACCAGTTCAAACAGATATCAGGGATATGGGT<br>CTAAGTCTACAGTGGCTGTATTCCGCTCGTGGAGAC<br>TACTTCCGTGCTACTTCTAGACTAACAA   |
| TGFB1  | NM_011577.1    | 1471-1570 | GGAGTTGTACGGCAGTGGCTGAACCAAGGAGACGG<br>AATACAGGGCTTTTCGATTCAGCGCTCACTGCTCTTG<br>TGACAGCAAAGATAACAAACTCCACGTGG |
| TGFB2  | NM_009367.1    | 1686-1785 | CCCAAAGCCAGAGTGGCCGAGCAGCGGATTGAACT<br>GTATCAGATCCTTAAATCCAAAGACTTAACATCTCCC<br>ACCCAGCGCTACATCGATAGCAAGGTTG  |
| TGFB3  | NM_009368.2    | 2411-2510 | TCATGTAATTAGTTTCTGGGCCAGCACTAGCTATC<br>TCAGGTCCCTTAGAGATGCTGGACTCAAAGCAGA<br>GGTCAGAATTGGTTCTCTCATGTATTCCC    |
| TGFBI  | NM_009369.4    | 1296-1395 | TCTGTGTTCAAAGATGGTGTCCCTCGCATCGACGCC<br>CAGATGAAGACTTTGCTTCTGAACCACATGGTCAA<br>GAACAGTTGGCCTCCAAGTATCTGTACT   |
| TGFBR2 | NM_009371.2    | 476-575   | TGTGCAAGTTTTGCGATGTGAGACTGTCCAATTGCG<br>ACAACCAGAAGTCTGTCATGAGCAACTGCAGCATCA<br>CGCCATCTGTGAGAAGCCGCATGAAGT   |
| THBD   | NM_009378.3    | 2846-2945 | CCTTTGACATGACAATAGGACATTGCTATCTTGAG<br>ACATACTGGGCCACATTCATAGCTTTCCAAGGATGT<br>ATGTGGTCCTGCCTCAACATATCAGAGC   |
| THPO   | XM_011245868.1 | 647-746   | ATCCCTGTTCTGCTGCCTGCTGTGGACTTTAGCCTG<br>GGAGAATGGAAAACCCAGACGGAACAGAGCAAGGC<br>ACAGGACATTCTAGGGGCAGTGTCCCTTC  |
| THY1   | NM_009382.3    | 426-525   | ACTTTTGTGAGCTTCAAGTCTCGGGCGCGAATCCCA<br>TGAGCTCCAATAAAAGTATCAGTGTGTATAGAGACA<br>AGCTGGTCAAGTGTGGCGGCATAAGCCT  |
| TIMP1  | NM_011593.2    | 437-536   | AAGCCTCTGTGGATATGCCACAAGTCCCAGAACCG<br>CAGTGAAGAGTTTCTCATCACGGGCCGCTAAGGA                                     |

|          |                |           |                                                                                                                |
|----------|----------------|-----------|----------------------------------------------------------------------------------------------------------------|
|          |                |           | ACGGAAATTTGCACATCAGTGCCTGCAGC                                                                                  |
| TIMP2    | NM_011594.3    | 656-755   | TTGCAGGAAAGGCAGAAGGAGATGGCAAGATGCAC<br>ATTACCCTCTGTGACTTCATTGTGCCCTGGGACACG<br>CTTAGCATCACCCAGAAGAAGAGCCTGAA   |
| TLR2     | NM_011905.2    | 256-355   | GCAGGCGGTCACTGGCAGGAGATGTGTCCGCAATC<br>ATAGTTTCTGATGGTGAAGGTTGGACGGCAGTCTCT<br>GCGACCTAGAAGTGGAAAAGATGTGCTTC   |
| TLR4     | NM_021297.2    | 2511-2610 | AACGGCAACTTGGACCTGAGGAGAACAAACTCTG<br>GGGCCTAAACCCAGTCTGTTTGCAATTAATAAATGC<br>TACAGCTCACCTGGGGCTCTGCTATGGAC    |
| TNF      | NM_013693.1    | 1136-1235 | TTCCTGAGTTCTGCAAAGGGAGAGTGGTCAGGTTG<br>CCTCTGTCTCAGAATGAGGCTGGATAAGATCTCAGG<br>CCTTCCTACCTTCAGACCTTCCAGACTC    |
| TNFRSF1A | NM_011609.2    | 616-715   | CTCCTTGCCAAGCTGACAAGGACACGGTGTGTGGC<br>TGTAAGGAGAACCAGTTCCAACGCTACCTGAGTGA<br>GACACACTTCCAGTGCCTGGACTGCAGCCC   |
| TNFRSF1B | NM_011610.3    | 3271-3370 | GTGTGTGTCCATGTTTGCATGTATGTGTGTGCCAGT<br>GTGTGGAGGCCAGAGGTTGGCTTTGGGTGTGTTT<br>ATCACTCTCAGTTACTGAGGCAGGGCTCT    |
| TNPO1    | NM_001048267.1 | 2161-2260 | GCATGCAGGATAAAAATGCCCGAGGTTCCGGCAGAGT<br>TCTTTTGCATTGCTAGGTGACCTGACTAAAGCGTGC<br>TTCCAGCATGTAAAGCCTTGTATAGCTGA |
| TPSAB1   | NM_031187.4    | 664-763   | GGCTGGGGTAACATCGACAATGGTGTAAACCTGCC<br>GCCACCATTTCTTTGAAGGAGGTGCAAGTTCCCAT<br>TATAGAAAACCACCTTTGTGACTTGAAGT    |
| TPSB2    | NM_010781.3    | 503-602   | TGATAATGACGAGCCTCTCCACCTCCTTATCCTCT<br>GAAGCAAGTGAAGGTTCCCATTTGTGAAAACAGCC<br>TGTGTGACCGGAAGTACCACACTGGCCTC    |
| TYROBP   | NM_011662.2    | 131-230   | CCCAGAGTGACACTTCCCAAGATGCGACTGTTCTT<br>CCGTGAGCCCTGGTGTACTGGCTGGGATTGTTCTG<br>GGTGACTTGGTGTGACTCTGCTGATTGC     |
| UCP2     | NM_011671.4    | 951-1050  | TGTGCTGAGCTGGTGACCTATGACCTCATCAAAGAT<br>ACTCTCCTGAAAGCCAACCTCATGACAGATGACCTC<br>CCTTGCCACTTCACTTCTGCCTTCGGGG   |
| UTS2     | NM_011910.2    | 81-180    | GAATCCACTGCTGTCCCTTCCCGTCACGGACACTGG<br>TGAGAGGACTCTTCAGCTTCCAGTGCTTGAGGAAGA<br>CGCTCTTCGGGCTCTGGAGGAGCTGGAG   |
| VCAM1    | NM_011693.2    | 1441-1540 | GGTTTTGAGGATGAACACTCTTACCTGTGCGCTGTG<br>ACCTGTCTGCAAAGGACACTGGAAAAGAGAACCCA<br>GGTGGAGGTCTACTCATTCCCTGAAGATC   |
| VEGFA    | NM_001025250.3 | 3016-3115 | TCTCTCTCTCCAGATCGGTGACAGTCACTAGCTTG<br>TCTGAGAAGATATTTAATTTTGCTAACACTCAGCTC<br>TGCCCTCCCTTGTCACCACACATT        |
| VIM      | NM_011701.4    | 35-134    | CAGCGCTCCTACGATTCACAGCCACCGCGCCCTCAT<br>TCCCTGTTGCAGTTTTTCCAGCCGAGCAAGCCAG<br>CCCACCTTCGAAGCCATGTCTACCAGGT     |
| VIPR1    | NM_011703.4    | 2481-2580 | CCTCCATCTTTATAGCGATAATGGCTTCTAATCCAAA<br>CTGGTGTGAGCGGGCTCTTCTCAGAGCTGCACCAG<br>GCTTGTATGACAATAAACATTGGCTCTA   |





**Supplementary Table 3. p-values from all comparisons in Figure 4D.**

| Gene name         | LDLr <sup>-/-</sup> mice                |                      |                                          |                      |                                          |                      |                               |                      | ApoE <sup>-/-</sup> mice                |                      |                                          |                      |                                          |                      |                               |                      |
|-------------------|-----------------------------------------|----------------------|------------------------------------------|----------------------|------------------------------------------|----------------------|-------------------------------|----------------------|-----------------------------------------|----------------------|------------------------------------------|----------------------|------------------------------------------|----------------------|-------------------------------|----------------------|
|                   | Vehicle, WD vs. Semaglutide, WD, 4µg/kg |                      | Vehicle, WD vs. Semaglutide, WD, 12µg/kg |                      | Vehicle, WD vs. Semaglutide, WD, 60µg/kg |                      | Vehicle, WD vs. Vehicle, Chow |                      | Vehicle, WD vs. Semaglutide, WD, 4µg/kg |                      | Vehicle, WD vs. Semaglutide, WD, 12µg/kg |                      | Vehicle, WD vs. Semaglutide, WD, 60µg/kg |                      | Vehicle, WD vs. Vehicle, Chow |                      |
|                   | p-value                                 | BH Corrected p-value | p-value                                  | BH Corrected p-value | p-value                                  | BH Corrected p-value | p-value                       | BH Corrected p-value | p-value                                 | BH Corrected p-value | p-value                                  | BH Corrected p-value | p-value                                  | BH Corrected p-value | p-value                       | BH Corrected p-value |
| <i>Abca1</i>      | <0.0001                                 | 0.0005               | <0.0001                                  | 0.0002               | 0.0004                                   | 0.0015               | <0.0001                       | <0.0001              | 0.2608                                  | 0.7789               | 0.5127                                   | 0.6387               | 0.9588                                   | 0.9813               | <0.0001                       | 0.0002               |
| <i>Ccl2</i>       | 0.0002                                  | 0.0011               | 0.0006                                   | 0.0020               | <0.0001                                  | 0.0002               | <0.0001                       | <0.0001              | 0.9318                                  | 0.9704               | 0.0121                                   | 0.0674               | 0.0024                                   | 0.0500               | 0.0022                        | 0.0080               |
| <i>Cd163</i>      | 0.0927                                  | 0.1620               | 0.3743                                   | 0.4567               | 0.0111                                   | 0.0246               | 0.4918                        | 0.6030               | 0.1093                                  | 0.7645               | 0.0085                                   | 0.0586               | 0.0161                                   | 0.1252               | 0.0275                        | 0.0645               |
| <i>Il1rn</i>      | <0.0001                                 | 0.0003               | <0.0001                                  | <0.0001              | <0.0001                                  | 0.0001               | <0.0001                       | <0.0001              | 0.7413                                  | 0.9226               | 0.0012                                   | 0.0232               | 0.0995                                   | 0.3336               | <0.0001                       | <0.0001              |
| <i>Il6</i>        | 0.0030                                  | 0.0091               | 0.0024                                   | 0.0062               | 0.0240                                   | 0.0473               | <0.0001                       | <0.0001              | 0.1615                                  | 0.7645               | 0.0026                                   | 0.0331               | 0.0419                                   | 0.1863               | 0.1669                        | 0.2636               |
| <i>Mmp13</i>      | 0.0002                                  | 0.0013               | <0.0001                                  | <0.0001              | 0.0029                                   | 0.0083               | 0.0005                        | 0.0011               | 0.0211                                  | 0.7222               | 0.0242                                   | 0.0995               | 0.0045                                   | 0.0661               | 0.0005                        | 0.0024               |
| <i>Mmp3</i>       | 0.1161                                  | 0.1913               | 0.0445                                   | 0.0788               | 0.0076                                   | 0.0186               | <0.0001                       | 0.0001               | 0.1812                                  | 0.7645               | 0.4223                                   | 0.5790               | 0.1853                                   | 0.4299               | 0.0077                        | 0.0233               |
| <i>Ptgis</i>      | 0.0006                                  | 0.0025               | <0.0001                                  | <0.0001              | 0.0006                                   | 0.0021               | <0.0001                       | <0.0001              | 0.8226                                  | 0.9405               | 0.0006                                   | 0.0181               | 0.0015                                   | 0.0500               | <0.0001                       | <0.0001              |
| <i>Sele</i>       | 0.0031                                  | 0.0093               | 0.0035                                   | 0.0084               | 0.0021                                   | 0.0064               | <0.0001                       | <0.0001              | 0.4404                                  | 0.8566               | 0.0011                                   | 0.0232               | 0.0306                                   | 0.1747               | <0.0001                       | 0.0002               |
| <i>Spp1 (Opn)</i> | <0.0001                                 | 0.0003               | <0.0001                                  | <0.0001              | <0.0001                                  | 0.0002               | <0.0001                       | <0.0001              | 0.1349                                  | 0.7645               | 0.0086                                   | 0.0586               | 0.1100                                   | 0.3523               | <0.0001                       | 0.0001               |
| <i>Vcam1</i>      | <0.0001                                 | 0.0006               | <0.0001                                  | <0.0001              | 0.0001                                   | 0.0004               | <0.0001                       | <0.0001              | 0.2080                                  | 0.7645               | 0.1999                                   | 0.3632               | 0.5642                                   | 0.7932               | <0.0001                       | <0.0001              |

BH = Benjamini-Hochberg

**Supplementary Table 4. p-values from all comparisons in Figures 5B & C**

| Gene name     | Vehicle, WD vs. Semaglutide, WD, 4µg/kg |                      | Vehicle, WD vs. Semaglutide, WD, 12µg/kg |                      | Vehicle, WD vs. Semaglutide, WD, 60µg/kg |                      | Vehicle, WD vs. Vehicle, Chow |                      |
|---------------|-----------------------------------------|----------------------|------------------------------------------|----------------------|------------------------------------------|----------------------|-------------------------------|----------------------|
|               | p-value                                 | BH Corrected p-value | p-value                                  | BH Corrected p-value | p-value                                  | BH Corrected p-value | p-value                       | BH Corrected p-value |
| <i>Agtr1a</i> | 0.0276                                  | 0.1147               | 0.0134                                   | 0.0473               | <0.0001                                  | 0.0003               | 0.0029                        | 0.0081               |
| <i>Casp3</i>  | 0.0011                                  | 0.0155               | 0.0002                                   | 0.0025               | 0.0002                                   | 0.0028               | 0.0134                        | 0.0289               |
| <i>Cx3cr1</i> | 0.0047                                  | 0.0404               | 0.0003                                   | 0.0025               | 0.0109                                   | 0.0588               | <0.0001                       | 0.0002               |
| <i>Hmox1</i>  | 0.0615                                  | 0.1777               | 0.0668                                   | 0.1483               | 0.0422                                   | 0.1561               | <0.0001                       | <0.0001              |
| <i>SI00A8</i> | <0.0001                                 | 0.0001               | 0.0001                                   | 0.0022               | 0.0001                                   | 0.0025               | 0.0008                        | 0.0030               |
| <i>SI00A9</i> | <0.0001                                 | 0.0001               | 0.0001                                   | 0.0013               | <0.0001                                  | 0.0017               | 0.0005                        | 0.0021               |
| <i>Timp1</i>  | 0.0036                                  | 0.0318               | 0.0002                                   | 0.0025               | 0.0061                                   | 0.0402               | 0.0001                        | 0.0005               |
| <i>Ace</i>    | 0.0026                                  | 0.0279               | 0.0002                                   | 0.0025               | 0.0021                                   | 0.0223               | 0.0003                        | 0.0013               |
| <i>Col1a1</i> | 0.1829                                  | 0.3505               | 0.0024                                   | 0.0127               | 0.1471                                   | 0.3014               | 0.0025                        | 0.0073               |
| <i>Col3a1</i> | 0.1948                                  | 0.3564               | 0.0018                                   | 0.0115               | 0.2020                                   | 0.3665               | 0.0004                        | 0.0019               |
| <i>Col1a2</i> | 0.1233                                  | 0.2748               | 0.0022                                   | 0.0124               | 0.3270                                   | 0.4928               | 0.0027                        | 0.0077               |
| <i>Col4a2</i> | 0.3702                                  | 0.5622               | 0.3073                                   | 0.4375               | 0.8863                                   | 0.9414               | 0.0300                        | 0.0549               |
| <i>Tlr2</i>   | 0.0003                                  | 0.0058               | 0.0128                                   | 0.0462               | 0.0053                                   | 0.0385               | <0.0001                       | <0.0001              |
| <i>Vegfa</i>  | 0.0239                                  | 0.1044               | 0.0001                                   | 0.0021               | 0.0048                                   | 0.0385               | 0.0077                        | 0.0183               |
| <i>Col4a1</i> | 0.4608                                  | 0.6285               | 0.1083                                   | 0.2000               | 0.4406                                   | 0.5942               | 0.0037                        | 0.0099               |

BH = Benjamini-Hochberg
